# Supplementary material
Source: publisher site journal article supplement (https://www.dovepress.com/article/567414)
Supplement: Supplementary file 1 [file 567414%20Supplementary%20Figures%201-4.docx]

**Supplementary Figure 1** The DSA imaging of HAPVF.


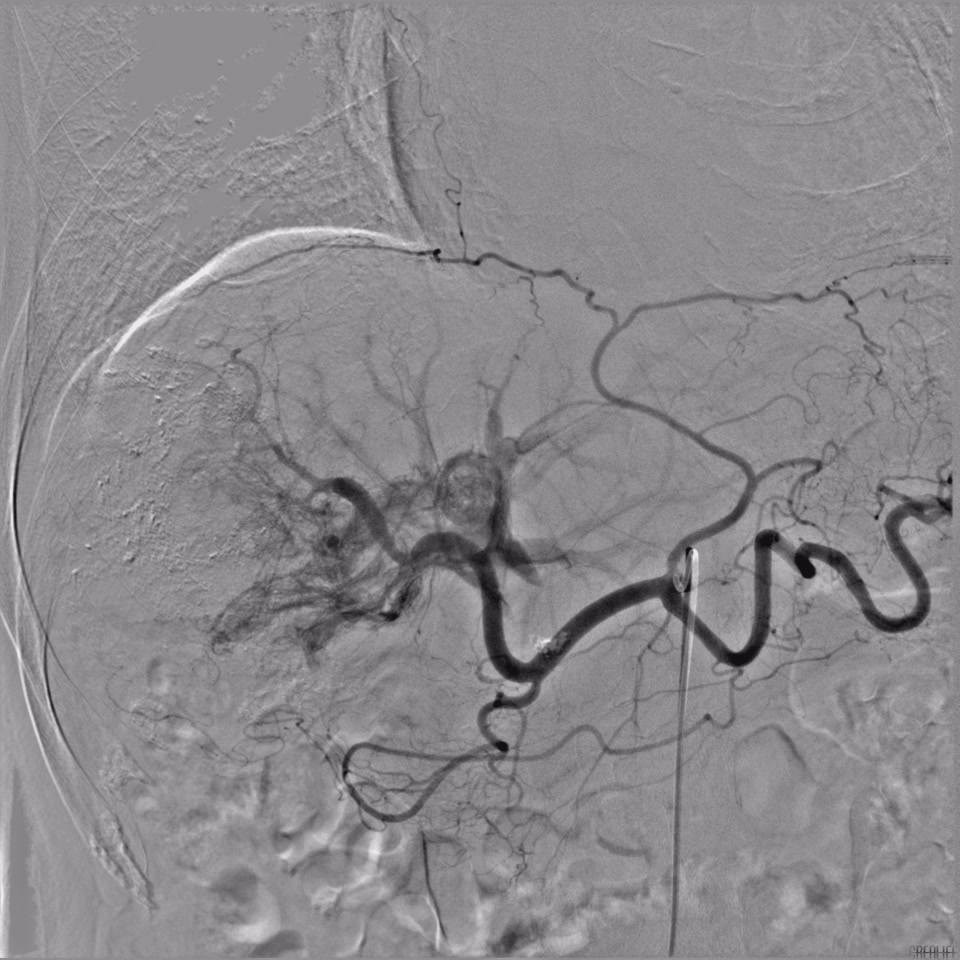


DSA, digital subtraction angiography; HAPVF, hepatic artery-portal vein fistula.

**Supplementary Figure 2** The DSA imaging of HAHVF.

**
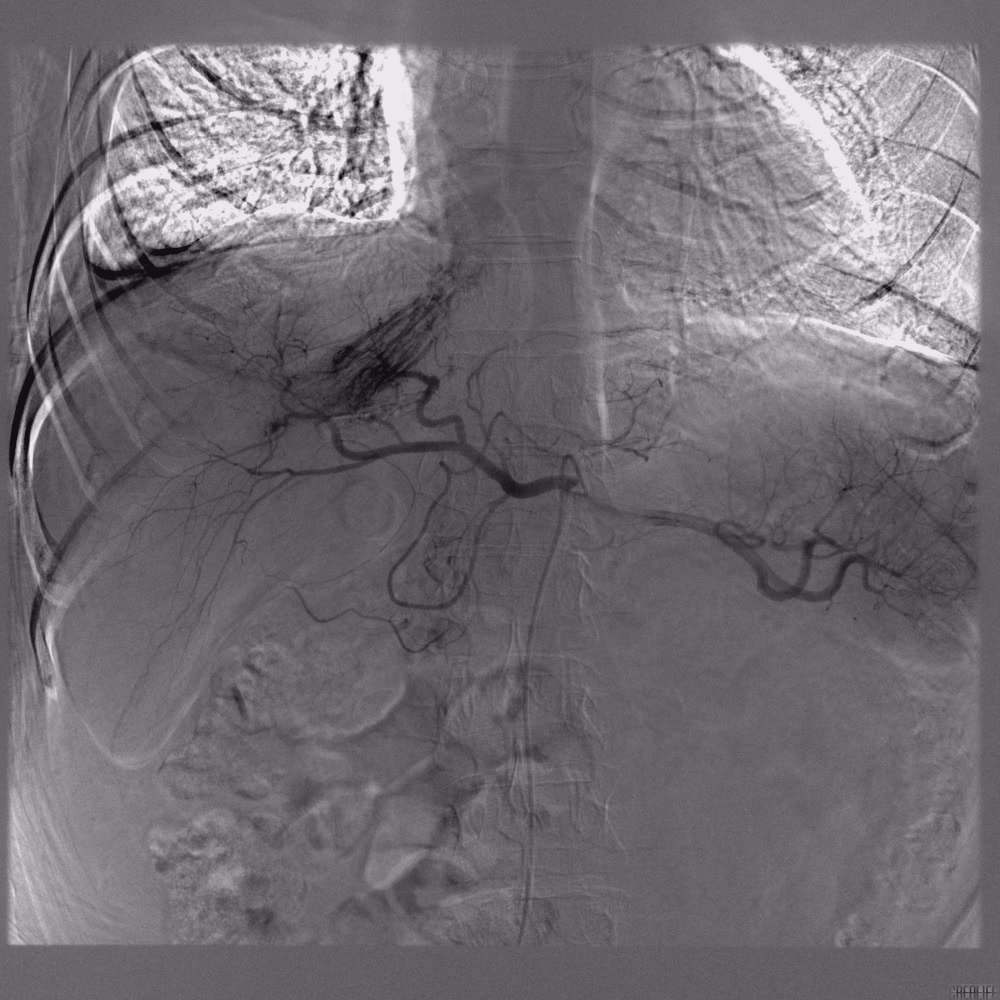
**

DSA, digital subtraction angiography; HAHVF, hepatic artery-hepatic vein fistula.

**Supplementary Figure 3** The DSA imaging of mixed-type fistula.


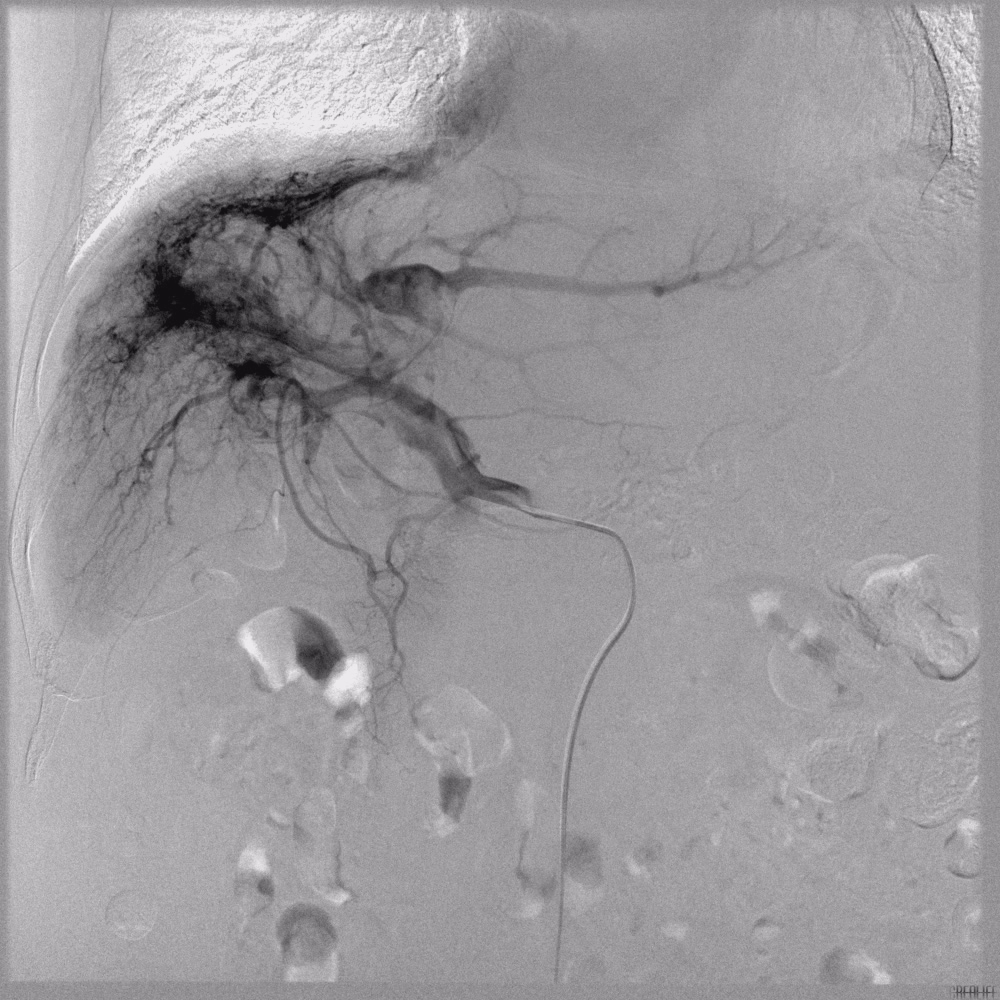


DSA, digital subtraction angiography.

**Supplementary Figure 4** The standardized mean difference plot of baseline characteristics before and after propensity score matching.


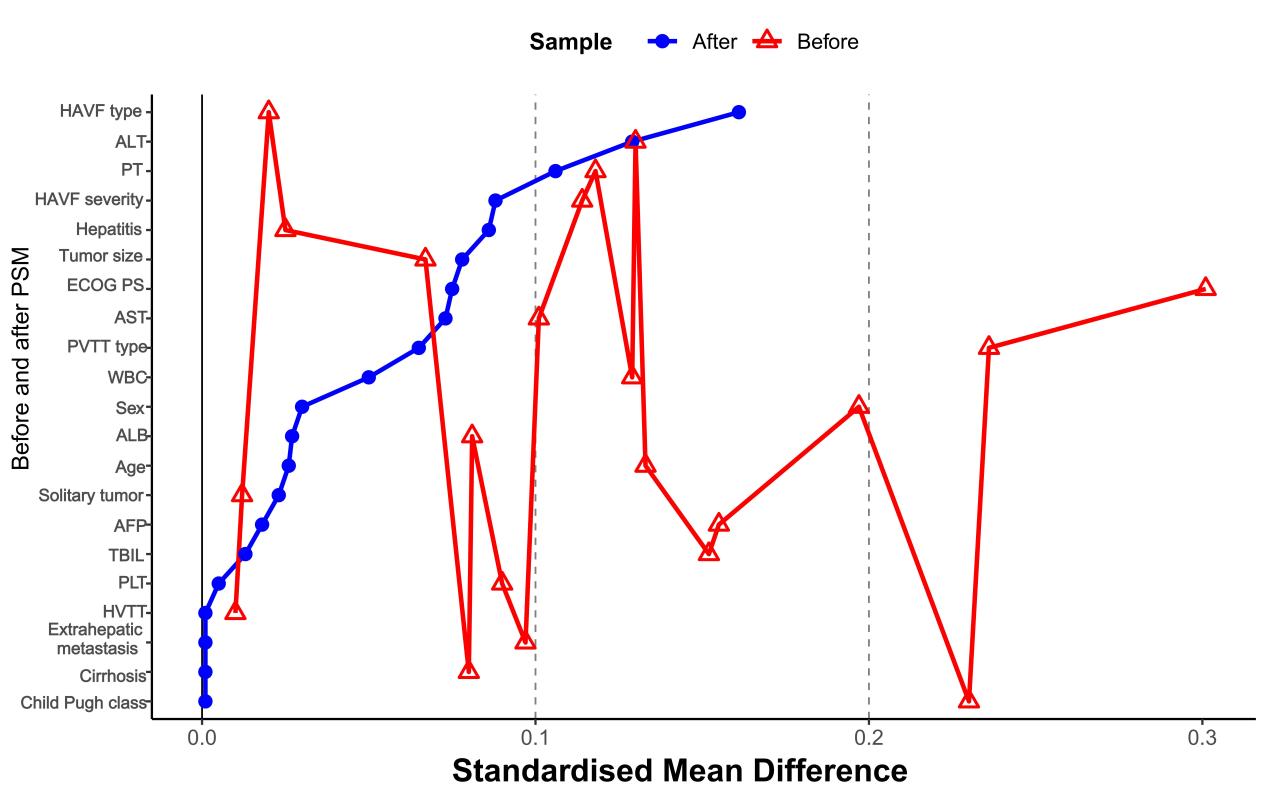


HAVF, hepatic arteriovenous fistula; ALT, alanine aminotransferase; PT, prothrombin time; ECOG PS, Eastern Cooperative Oncology Group performance status; AST, aspartate aminotransferase; PVTT, portal vein tumor thrombus; WBC, white blood cell; ALB, albumin; AFP, alpha-fetoprotein; TBIL, total bilirubin; PLT, platelet; HVTT, hepatic vein tumor thrombus.
